# Supplementary material
Source: Royal Society of Chemistry journal article supplement (doi:10.1039/d6dt00165c)
Supplement: d6dt00165c1.pdf [file d6dt00165c1.pdf]

## Supplementary Material Information (SMI) for “Effect of Al doping on the microwave absorption performance of 1T/2H heterogeneous interface MoSe<sub>2</sub>”

Qing Liu<sup>a</sup>, Kewei Zou<sup>a</sup>, Qiangchun Liu<sup>a</sup>, Xiangkai Kong<sup>b</sup>, Weiwei Zhang<sup>a</sup>, Min Zhang<sup>a,\*</sup>

<sup>a</sup>Anhui Province Key Laboratory of Pollutant Sensitive Materials and Environmental Remediation,  
College of Energy Science and Engineering, Anhui Province Industrial Generic Technology  
Research Center for Alumics Materials, Huaibei Normal University, Huaibei 235000, China

<sup>b</sup>School of Materials and Physics, China University of Mining and Technology, Xuzhou,  
Jiangsu, 221116, China

**Table S1** The specific surface area ( $S_{\text{BET}}$ ) and pore volume ( $V_{\text{pore}}$ ) for all prepared samples

| Sample                                 | AM00   | AM01   | AM02   | AM03   | AM04   |
|----------------------------------------|--------|--------|--------|--------|--------|
| $S_{\text{BET}}$ (m <sup>2</sup> /g)   | 28.156 | 30.890 | 32.610 | 45.161 | 23.404 |
| $V_{\text{pore}}$ (cm <sup>3</sup> /g) | 0.106  | 0.140  | 0.137  | 0.227  | 0.127  |

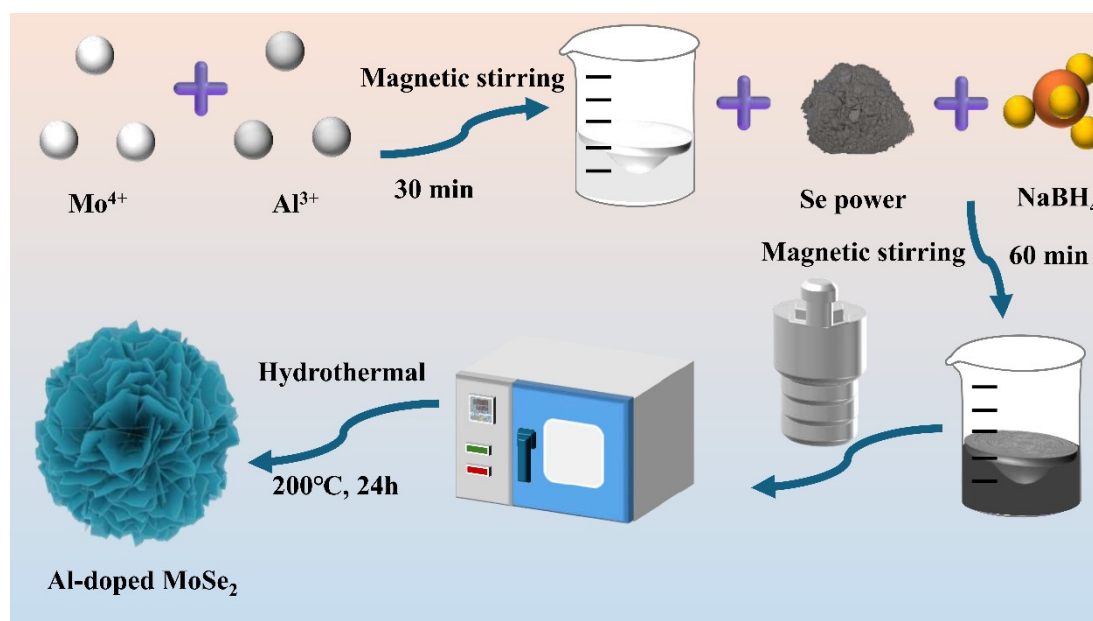

**Fig. S1.** Schematic diagram of the synthesis process for the Al-doped MoSe<sub>2</sub>.

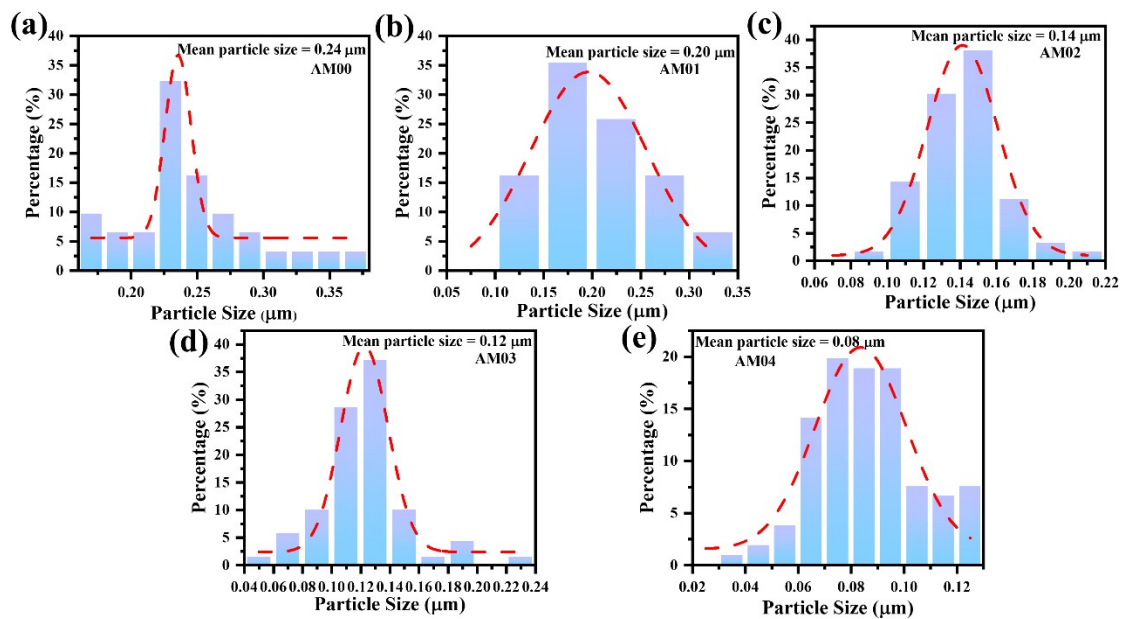

**Fig. S2.** Statistical chart of particle size of (a) AM00, (b) AM01, (c) AM02, (d) AM03, and (e) AM04

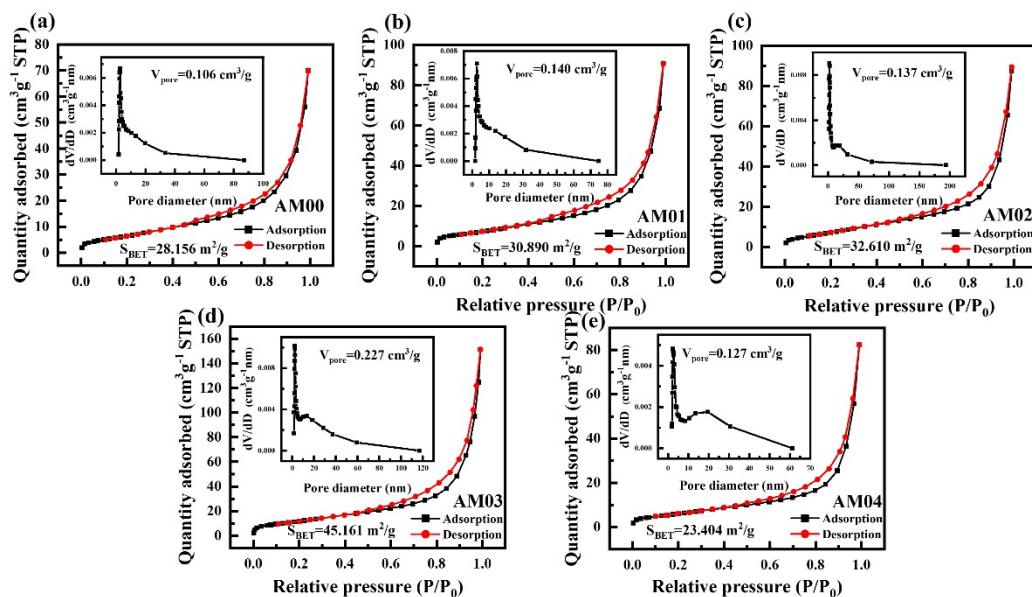

**Fig. S3.** N<sub>2</sub> adsorption-desorption isotherm and pore size distribution of all prepared samples

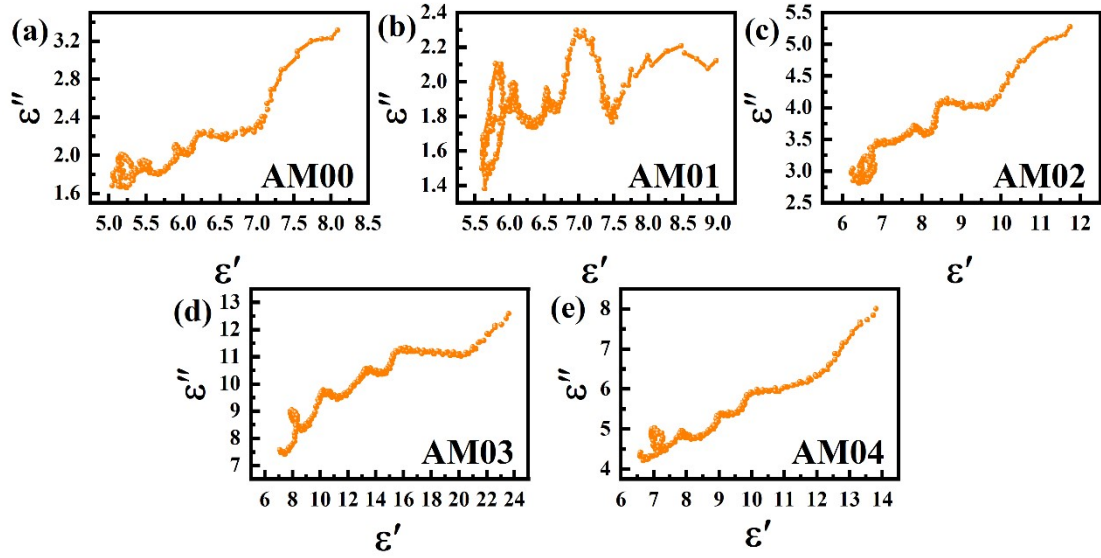

Fig. S4. Cole-Cole plots for all five samples

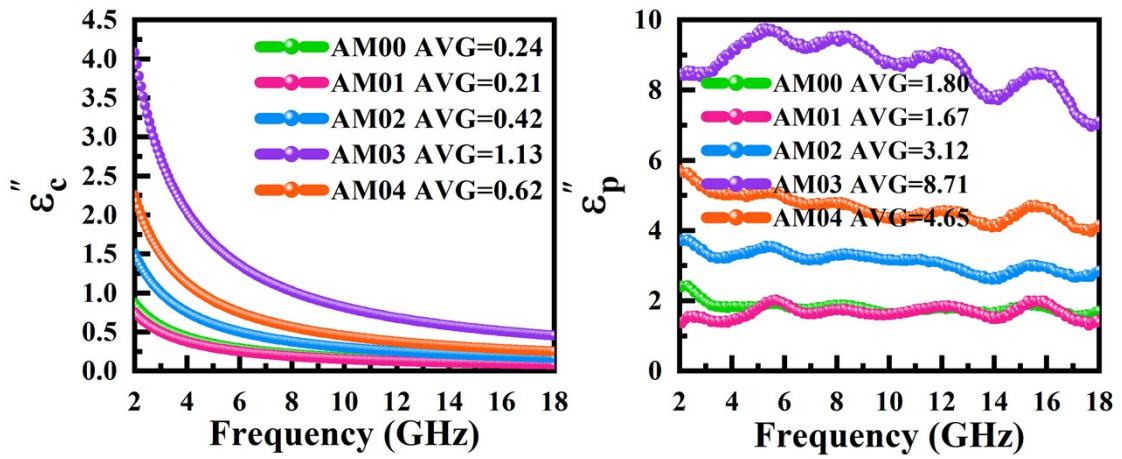

Fig. S5. Conductive loss ( $\epsilon_c''$ ) and polarization loss ( $\epsilon_p''$ ) values for all prepared samples

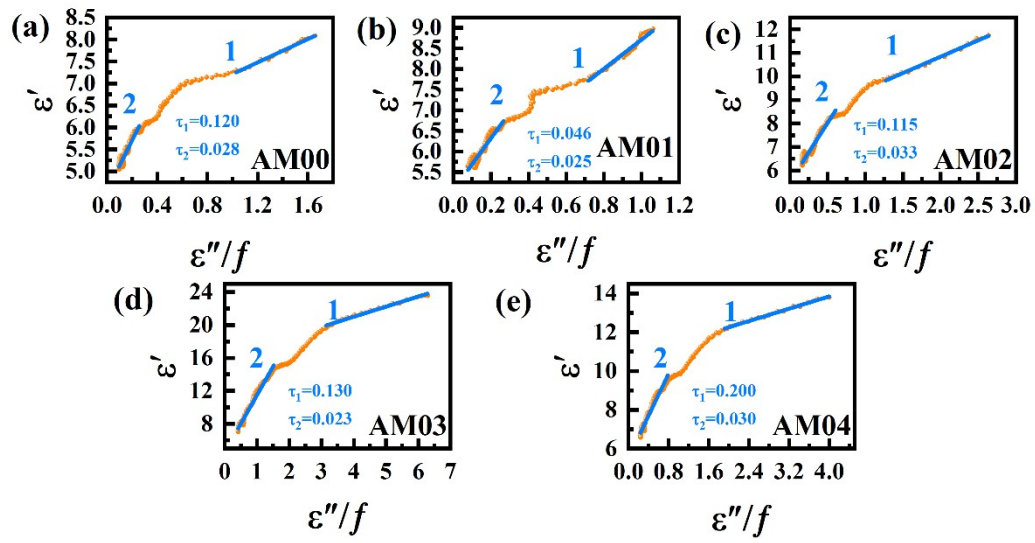

Fig. S6.  $\epsilon'/\epsilon''$ - $f$  plots for all five samples
